# Supplementary material for: Composition and sources of carbonaceous aerosol in the European Arctic at Zeppelin Observatory, Svalbard
Source: Copernicus journal article supplement (doi:10.5194/egusphere-2023-615), 2023-04-25
Supplement: Supplementary file 1 [file egusphere-2023-615-supplement.pdf]

1 Supplement of

2

3 **Composition and sources of carbonaceous aerosol in**

4 **the European Arctic at Zeppelin Observatory,**

5 **Svalbard**

6

7

Table S1: Equations used for source apportionment of carbonaceous aerosol, following the Latin Hypercube Sampling (LHS) approach. See sect. 2.8 and Yttri et al. (2011a) for more details.

---


$$EC = [EC] \times \Phi_{EC} \quad (\text{eq.1})$$

$$OC = [OC_p] + \Phi_{NA} \times ([OC_F] - [OC_B]) \quad (\text{eq.2})$$

$$TC = OC + EC \quad (\text{eq.3})$$

$$F_{14C-T C} = [F_{14C-T C}] \times \Phi^{14}C-T C \quad (\text{eq.4})$$

$$F_{14C-EC} = [F_{14C-EC}] \times \Phi^{14}C-EC \quad (\text{eq.5})$$

$$F_{14C-OC} = (F_{14C-T C} - F_{14C-EC} \times EC/TC) / (1 - EC/TC) \quad (\text{eq.6})$$

$$F_{EC-NF} = F_{14C-EC} / F_{14C-BB} \quad (\text{eq.7})$$

$$EC_{BB} = F_{EC-NF} \times EC \quad (\text{eq.8})$$

$$OC_{BB} = EC_{BB} \times (OC/EC)_{BB} \quad (\text{eq.9})$$

$$EC_{FF} = [EC] - [EC_{BB}] \quad (\text{eq.10})$$

$$OC_{PBC} = [Cellulose] \times (OC / Cellulose)_{PBC} \quad (\text{eq.11})$$

$$OC_{PBS} = [Mannitol] \times (OC / Mannitol)_{PBS} \quad (\text{eq.12})$$

$$OC_{BSOA} = \frac{F_{14C-OC} \times OC - (F_{14C-BB} \times OC_{BB} + F_{14C-PBC} \times OC_{PBC} + OC_{PBS})}{F^{14}C-BSOA} \quad (\text{eq.13})$$

$F^{14}C-BSOA$

---

Notes:

Square brackets denote measured quantities.

Equation (6) is derived from:

$$TC \times F_{14C-T C} = OC \times F_{14C-OC} + EC \times F_{14C-EC}$$

$$F_{14C-OC} = (TC \times F_{14C-T C} - EC \times F_{14C-EC}) / (TC - EC) = (TC \times F_{14C-T C} - EC \times F_{14C-EC}) / (TC - EC) = F_{14C-T C} - EC/TC \times F_{14C-EC} / (1 - EC/TC)$$

Table S2. Emission ratios used for the LHS source apportionment approach of carbonaceous aerosol. Low, central, and high values are listed. See sect. 2.8, Yttri et al. (2011a) for more details.

| Parameter              | Low   | Central | High | Eqn. | Accounts for                                                              |
|------------------------|-------|---------|------|------|---------------------------------------------------------------------------|
| $\Phi_{EC}$            | 0.75  | 1.0     | 1.25 | 1    | Uncertainty in EC measurement                                             |
| $\Phi_{NA}$            | 0.0   | 0.2     | 1.0  | 2    | Negative sampling artefact of OC                                          |
| $\Phi^{14}C-TC$        | 0.95  | 1.0     | 1.05 | 4    | Uncertainty in $^{14}C-TC_{\text{Measurement}}$                           |
| $\Phi^{14}C-EC$        | 0.85  | 1.0     | 1.15 | 5    | in $\Phi^{14}C-EC_{\text{Measurement}}$                                   |
| $\Phi_{F^{14}C}$       | 1.055 | -       | 1.25 | 7    | Variability in modern carbon age of BB; Notation includes RWC, WF and AWB |
| $(OC/EC)_{BB}$         | 3.3   | 6.2     | 9.1  | 9    | Wildfires. Derived from Saarikoski et al., (2007); Yttri et al. (2014).   |
| $(OC/Cellulose)_{PBC}$ | 0.8   | 1.6     | 3.2  | 11   | $OC_{PBC}$ calculation                                                    |
| $(OC/Mannitol)_{PBS}$  | 5.2   | -       | 10.8 | 12   | $OC_{PBS}$ calculation                                                    |
| $F_{14C_{BSOA}}$       |       | 1.055   |      | 13   | Modern carbon                                                             |
| $F_{14C_{PBS}}$        | 1.055 | -       | 1.25 | 13   | Fungal Spores                                                             |
| $F_{14C_{PBC}}$        | 1.055 | -       | 1.25 | 13   | Plant debris                                                              |

**Table S3:** Source apportionment of CA by LHS for samples collected at the Zeppelin Observatory (2017 to 2018). Mean (10th, 50 th, 90th percentiles) are provided. Unit: ng C m<sup>-3</sup>.

| Start date | End date   | OC <sub>BSOA</sub> | OC <sub>FF</sub> | OC <sub>BB</sub>  | OC <sub>PBC</sub> | OC <sub>PBS</sub>     | EC <sub>FF</sub>  | EC <sub>BB</sub>  |
|------------|------------|--------------------|------------------|-------------------|-------------------|-----------------------|-------------------|-------------------|
| 23.02.2017 | 02.03.2017 | 33 (4.4-27-70)     | 92 (67-93-115)   | 137 (107-132-175) | 5.7 (3.0-5.1-9.0) | 0.1 (0.1-0.1-0.1)     | 7.7 (3.3-8.0-12)  | 32 (28-32-37)     |
| 05.05.2017 | 15.05.2017 | 55 (9.3-49-113)    | 5.7 (0.8-4.9-12) | 97 (63-98-128)    | 0.7 (0.4-0.6-1.1) | 0.0 (0.0-0.0-0.0)     | 9.0 (6.7-9.0-11)  | 15 (13-15-17)     |
| 31.05.2017 | 26.06.2017 | 64 (37-58-98)      | 25 (18-24-34)    | 24 (15-24-34)     | 3.4 (1.8-3-5.4)   | 0.41 (0.29-0.41-0.52) | 2.1 (1.4-2.1-2.7) | 3.9 (3.3-3.9-4.6) |
| 08.09.2017 | 28.09.2017 | 52 (27-47-83)      | 10 (5.7-10-16)   | 26 (16-25-36)     | 2.9 (1.6-2.6-4.7) | 1.2 (0.84-1.2-1.5)    | 1.9 (1.2-1.9-2.5) | 4.1 (3.5-4.1-4.8) |
| 28.09.2017 | 06.10.2017 | 422 (241-384-657)  | 27 (4.9-24-51)   | 194 (119-195-266) | 13 (7-12-21)      | 8.9 (6.4-8.9-11)      | 22 (17-22-26)     | 30 (26-30-35)     |
| 06.10.2017 | 24.10.2017 | 18 (3.6-16-37)     | 20 (13-19-27)    | 33 (22-31-46)     | 1.4 (0.7-1.3-2.3) | 0.9 (0.6-0.9-1.1)     | 2.0 (1.1-2.1-2.9) | 6 (5.1-5.9-6.9)   |
| 05.12.2017 | 13.12.2017 | N/A                | N/A              | N/A               | N/A               | N/A                   | N/A               | N/A               |
| 23.01.2018 | 31.01.2018 | 73 (48-67-106)     | 74 (56-67-102)   | 21 (13-21-29)     | 1.3 (0.7-1.2-2.1) | 0.1 (0.1-0.1-0.1)     | 13 (12-13-13)     | 3.4 (2.9-3.4-3.9) |
| 21.03.2018 | 29.03.2018 | 50 (12-46-94)      | 14 (5.5-13-23)   | 62 (39-62-87)     | 0.7 (0.4-0.6-1.1) | 0.1 (0.1-0.1-0.1)     | 7.6 (5.9-7.6-9.1) | 10 (8.9-10-12)    |
| 06.04.2018 | 16.04.2018 | 66 (24-62-114)     | 13- (5.1-13-22)  | 58 (36-57-81)     | 0.4 (0.2-0.3-0.6) | 0.1 (0.0-0.1-0.1)     | 7.6 (6.1-7.6-9)   | 9.4 (8-9.4-11)    |
| 12.07.2018 | 30.07.2018 | 30 (17-27-47)      | 18 (13-17-24)    | 13 (7.7-12-18)    | 1.4 (0.7-1.2-2.2) | 1.4 (1.0-1.4-1.7)     | 1.0 (0.6-1.0-1.3) | 2 (1.7-2-2.4)     |
| 30.07.2018 | 15.08.2018 | 192 (130-174-280)  | 18 (6.8-17-30)   | 42 (25-41-59)     | 4.8 (2.5-4.3-7.7) | 2.1 (1.5-2.2-2.7)     | 2.3 (1.2-2.2-3.3) | 6.7 (5.7-6.7-7.8) |
| 23.11.2018 | 03.12.2018 | 10 (1.5-7.9-21)    | 23 (15-24-30)    | 33 (25-31-42)     | 1.9 (1-1.7-3.1)   | 0.2 (0.2-0.2-0.3)     | 5.6 (4.4-5.7-6.6) | 7.4 (6.4-7.3-8.6) |

**Table S4:** Source apportionment of CA by LHS for samples collected at the Zeppelin Observatory (2017 to 2018). Mean (10th, 50 th, 90th percentiles) percentiles are provided. Unit: %

| Start date | End date   | OC <sub>BSOA</sub> /TC | OC <sub>FF</sub> /TC | OC <sub>BB</sub> /TC | OC <sub>PBC</sub> /TC | OC <sub>PBS</sub> /TC | EC <sub>FF</sub> /TC | EC <sub>BB</sub> /TC | EC <sub>FF</sub> /EC | EC <sub>BB</sub> /EC |
|------------|------------|------------------------|----------------------|----------------------|-----------------------|-----------------------|----------------------|----------------------|----------------------|----------------------|
| 23.02.2017 | 02.03.2017 | 11 (1.7-9.1-21)        | 30 (25-30-34)        | 45 (36-45-53)        | 1.9 (1.0-1.8-2.9)     | 0.0 (0.0-0.0-0.0)     | 2.6 (1.0-2.6-4.2)    | 11 (8.7-10-13)       | 19 (8.3-20-29)       | 81 (71-80-92)        |
| 05.05.2017 | 15.05.2017 | 28 (6-28-52)           | 3.1 (0.4-2.7-6.6)    | 54 (34-55-73)        | 0.4 (0.2-0.3-0.6)     | 0.0 (0.0-0.0-0.0)     | 5.1 (3.3-5.1-7.1)    | 8.5 (6.2-8.5-11)     | 38 (53-38-72)        | 62 (28-62-47)        |
| 31.05.2017 | 29.06.2017 | 51 (37-52-63)          | 20 (16-20-24)        | 21 (12-20-31)        | 2.9 (1.4-2.6-4.8)     | 0.3 (0.2-0.3-0.5)     | 1.8 (1.1-1.7-2.5)    | 3.3 (2.3-3.4-4.3)    | 34 (24-35-44)        | 66 (56-65-76)        |
| 08.09.2017 | 28.09.2017 | 51 (34-53-67)          | 11 (6.2-11-15)       | 27 (15-26-41)        | 3.1 (1.6-2.8-5.2)     | 1.2 (0.8-1.2-1.7)     | 2.0 (1.1-1.9-2.9)    | 4.4 (3.1-4.4-5.7)    | 31 (20-31-42)        | 69 (58-69-80)        |
| 28.09.2017 | 06.10.2017 | 57 (41-58-72)          | 3.7 (0.7-3.5-7.0)    | 28 (16-28-42)        | 1.9 (1.0-1.7-3.7)     | 1.3 (0.8-1.2-1.8)     | 3.2 (2.1-3.1-4.3)    | 4.4 (3.1-4.4-5.6)    | 42 (33-42-51)        | 58 (49-58-67)        |
| 06.10.2017 | 24.10.2017 | 22 (5-21-39)           | 24 (19-24-29)        | 41 (27-41-55)        | 1.8 (0.9-1.7-3.0)     | 1.1 (0.71-1.1-1.6)    | 2.6 (1.3-2.6-4.1)    | 1.9 (1.0-1.7-3.7)    | 25 (14-26-36)        | 75 (64-74-86)        |
| 05.12.2017 | 13.12.2017 | N/A                    | N/A                  | N/A                  | N/A                   | N/A                   | N/A                  | N/A                  | N/A                  | N/A                  |
| 23.01.2018 | 31.01.2018 | 38 (32-39-45)          | 40 (37-40-43)        | 12 (7-11-18)         | 0.7 (0.4-0.7-1.2)     | 0.0 (0.0-0.0-0.1)     | 7.1 (5.1-7.4-8.7)    | 7.6 (5.6-7.5-10)     | 79 (75-79-82)        | 21 (18-21-25)        |
| 21.03.2018 | 29.03.2018 | 33 (9-34-55)           | 9.3 (4.1-9.3-14)     | 44 (26-43-64)        | 0.5 (0.2-0.4-0.8)     | 0.1 (0.1-0.1-0.1)     | 5.4 (3.7-5.4-7.3)    | 7.4 (5.4-7.5-9.5)    | 42 (33-42-51)        | 58 (49-58-67)        |
| 06.04.2018 | 16.04.2018 | 41 (18-43-61)          | 8.5 (3.5-8.5-13)     | 39 (22-38-58)        | 0.2 (0.1-0.2-0.4)     | 0.0 (0.0-0.0-0.1)     | 5.1 (3.5-5.1-6.7)    | 6.3 (4.5-6.38.1)     | 45 (36-45-53)        | 55 (47-55-64)        |
| 12.07.2018 | 30.07.2018 | 44 (31-45-56)          | 27 (23-27-30)        | 20 (11-19-30)        | 2.2 (1.1-1.9-3.6)     | 2.1 (1.4-2.1-3.0)     | 1.5 (0.9-1.5-2.2)    | 3.2 (2.2-3.2-4.1)    | 32 (21-3.2-42)       | 68 (58-68-79)        |
| 30.07.2018 | 15.08.2018 | 71 (60-72-81)          | 6.8 (2.7-6.7-11)     | 16 (9-15-24)         | 1.9 (0.9-1.7-3.2)     | 0.8 (0.5-0.8-1.2)     | 0.9 (0.9-1.4-2.0)    | 2.6 (1.8-2.6-3.4)    | 25 (13-26-37)        | 75 (63-74-87)        |
| 23.11.2018 | 03.12.2018 | 11 (2.1-10-23)         | 28 (23-28-33)        | 41 (31-41-49)        | 2.5 (1.3-2.3-3.8)     | 0.3 (0.2-0.3-0.4)     | 7.2 (5.0-7.0-9.9)    | 9.4 (7.4-9.2-12)     | 43 (34-44-51)        | 57 (59-56-66)        |

**Table S5:** Annual and seasonal mean concentrations of OC, EC, and organic tracers at Birkenes Observatory (Norway) and at Ispra (Italy), 2017 to 2020.

|                 | OC<br>( $\mu\text{g C m}^{-3}$ ) | EC<br>( $\mu\text{g C m}^{-3}$ ) | Levoglucosan<br>( $\text{ng m}^{-3}$ ) | Mannosan<br>( $\text{ng m}^{-3}$ ) | Galactosan<br>( $\text{ng m}^{-3}$ ) | Arabitol<br>( $\text{ng m}^{-3}$ ) | Mannitol<br>( $\text{ng m}^{-3}$ ) | Glucose<br>( $\text{ng m}^{-3}$ ) | Trehalose<br>( $\text{ng m}^{-3}$ ) | 2-methylerythritol<br>( $\text{ng m}^{-3}$ ) | 2-methylerythritol<br>( $\text{ng m}^{-3}$ ) |
|-----------------|----------------------------------|----------------------------------|----------------------------------------|------------------------------------|--------------------------------------|------------------------------------|------------------------------------|-----------------------------------|-------------------------------------|----------------------------------------------|----------------------------------------------|
| <i>Birkenes</i> |                                  |                                  |                                        |                                    |                                      |                                    |                                    |                                   |                                     |                                              |                                              |
| <b>2017</b>     | <b>0.72</b>                      | <b>0.05</b>                      | <b>8.24</b>                            | <b>1.35</b>                        | <b>0.32</b>                          | <b>5.52</b>                        | <b>5.70</b>                        | <b>5.17</b>                       | <b>3.37</b>                         | <b>0.37</b>                                  | <b>0.10</b>                                  |
| DJF             | 0.57                             | 0.07                             | 15.77                                  | 2.49                               | 0.65                                 | 1.16                               | 1.40                               | 2.03                              | 1.03                                | 0.01                                         | 0.01                                         |
| MAM             | 0.65                             | 0.05                             | 7.62                                   | 0.98                               | 0.23                                 | 3.90                               | 3.65                               | 4.11                              | 1.58                                | 0.05                                         | 0.02                                         |
| JJA             | 0.92                             | 0.03                             | 2.37                                   | 0.48                               | 0.06                                 | 9.15                               | 8.45                               | 7.09                              | 4.21                                | 1.32                                         | 0.35                                         |
| SON             | 0.77                             | 0.06                             | 7.92                                   | 1.31                               | 0.29                                 | 8.18                               | 9.49                               | 7.58                              | 6.61                                | 0.17                                         | 0.06                                         |
| <b>2018</b>     | <b>0.96</b>                      | <b>0.08</b>                      | <b>9.77</b>                            | <b>1.62</b>                        | <b>0.39</b>                          | <b>5.76</b>                        | <b>5.65</b>                        | <b>4.16</b>                       | <b>2.83</b>                         | <b>0.45</b>                                  | <b>0.16</b>                                  |
| DJF             | 0.49                             | 0.07                             | 13.50                                  | 2.21                               | 0.60                                 | 0.72                               | 0.94                               | 2.74                              | 0.60                                | 0.01                                         | 0.01                                         |
| MAM             | 1.32                             | 0.11                             | 13.64                                  | 2.04                               | 0.54                                 | 4.18                               | 4.21                               | 3.59                              | 1.91                                | 0.24                                         | 0.08                                         |
| JJA             | 1.20                             | 0.05                             | 1.38                                   | 0.25                               | 0.04                                 | 8.66                               | 7.94                               | 4.52                              | 2.90                                | 1.24                                         | 0.42                                         |
| SON             | 0.81                             | 0.08                             | 10.64                                  | 2.01                               | 0.41                                 | 9.38                               | 9.47                               | 5.79                              | 5.91                                | 0.25                                         | 0.12                                         |
| <b>2019</b>     | <b>0.93</b>                      | <b>0.08</b>                      | <b>8.30</b>                            | <b>1.37</b>                        | <b>0.29</b>                          |                                    |                                    |                                   |                                     |                                              |                                              |
| DJF             | 0.55                             | 0.09                             | 16.8                                   | 2.73                               | 0.61                                 |                                    |                                    |                                   |                                     |                                              |                                              |
| MAM             | 1.44                             | 0.12                             | 8.36                                   | 1.20                               | 0.26                                 |                                    |                                    |                                   |                                     |                                              |                                              |
| JJA             | 1.13                             | 0.05                             | 1.32                                   | 0.27                               | 0.04                                 |                                    |                                    |                                   |                                     |                                              |                                              |
| SON             | 0.57                             | 0.05                             | 6.91                                   | 1.29                               | 0.23                                 |                                    |                                    |                                   |                                     |                                              |                                              |
| <b>2020</b>     | <b>0.82</b>                      | <b>0.08</b>                      | <b>7.73</b>                            | <b>1.31</b>                        | <b>0.33</b>                          |                                    |                                    |                                   |                                     |                                              |                                              |
| DJF             | 0.31                             | 0.06                             | 7.73                                   | 1.29                               | 0.33                                 |                                    |                                    |                                   |                                     |                                              |                                              |
| MAM             | 0.96                             | 0.10                             | 10.7                                   | 1.69                               | 0.42                                 |                                    |                                    |                                   |                                     |                                              |                                              |
| JJA             | 1.34                             | 0.06                             | 1.62                                   | 0.32                               | 0.04                                 |                                    |                                    |                                   |                                     |                                              |                                              |
| SON             | 0.70                             | 0.09                             | 10.61                                  | 1.88                               | 0.50                                 |                                    |                                    |                                   |                                     |                                              |                                              |
| Mean $\pm$ SD   |                                  |                                  |                                        |                                    |                                      |                                    |                                    |                                   |                                     |                                              |                                              |
| <b>Annual</b>   | <b>0.86<math>\pm</math>0.11</b>  | <b>0.07<math>\pm</math>0.01</b>  | <b>8.51<math>\pm</math>0.88</b>        | <b>1.41<math>\pm</math>0.14</b>    | <b>0.33<math>\pm</math>0.04</b>      | <b>5.64<math>\pm</math>0.17</b>    | <b>5.68<math>\pm</math>0.04</b>    | <b>4.67<math>\pm</math>0.71</b>   | <b>3.10<math>\pm</math>0.38</b>     | <b>0.41<math>\pm</math>0.06</b>              | <b>0.13<math>\pm</math>0.04</b>              |
| DJF             | 0.48 $\pm$ 0.12                  | 0.07 $\pm$ 0.01                  | 13.45 $\pm$ 4.05                       | 2.18 $\pm$ 0.63                    | 0.55 $\pm$ 0.15                      | 0.94 $\pm$ 0.31                    | 1.17 $\pm$ 0.33                    | 2.39 $\pm$ 0.50                   | 0.82 $\pm$ 0.30                     | 0.01 $\pm$ 0.00                              | 0.01 $\pm$ 0.00                              |
| MAM             | 1.09 $\pm$ 0.36                  | 0.10 $\pm$ 0.03                  | 10.08 $\pm$ 2.71                       | 1.48 $\pm$ 0.48                    | 0.36 $\pm$ 0.14                      | 4.04 $\pm$ 0.20                    | 3.93 $\pm$ 0.40                    | 3.85 $\pm$ 0.37                   | 1.75 $\pm$ 0.23                     | 0.15 $\pm$ 0.13                              | 0.05 $\pm$ 0.04                              |
| JJA             | 1.15 $\pm$ 0.18                  | 0.05 $\pm$ 0.01                  | 1.67 $\pm$ 0.48                        | 0.33 $\pm$ 0.10                    | 0.05 $\pm$ 0.01                      | 8.91 $\pm$ 0.35                    | 8.20 $\pm$ 0.36                    | 5.81 $\pm$ 1.82                   | 3.56 $\pm$ 0.93                     | 1.28 $\pm$ 0.06                              | 0.39 $\pm$ 0.05                              |
| SON             | 0.71 $\pm$ 0.11                  | 0.07 $\pm$ 0.02                  | 9.02 $\pm$ 1.90                        | 1.62 $\pm$ 0.38                    | 0.36 $\pm$ 0.12                      | 8.78 $\pm$ 0.85                    | 9.48 $\pm$ 0.01                    | 6.69 $\pm$ 1.27                   | 6.26 $\pm$ 0.49                     | 0.21 $\pm$ 0.06                              | 0.09 $\pm$ 0.04                              |
| H-S             | 0.75 $\pm$ 0.18                  | 0.08 $\pm$ 0.02                  | 11.90 $\pm$ 1.79                       | 1.91 $\pm$ 0.30                    | 0.48 $\pm$ 0.08                      | 2.50 $\pm$ 0.11                    | 2.55 $\pm$ 0.14                    | 3.94 $\pm$ 0.75                   | 1.39 $\pm$ 0.10                     | 0.09 $\pm$ 0.04                              | 0.03 $\pm$ 0.02                              |
| NH-S            | 1.02 $\pm$ 0.09                  | 0.06 $\pm$ 0.01                  | 3.70 $\pm$ 0.52                        | 0.70 $\pm$ 0.09                    | 0.12 $\pm$ 0.02                      | 10.11 $\pm$ 0.12                   | 10.14 $\pm$ 0.46                   | 6.81 $\pm$ 1.55                   | 5.56 $\pm$ 1.17                     | 0.86 $\pm$ 0.04                              | 0.28 $\pm$ 0.06                              |
| <i>Ispra</i>    |                                  |                                  |                                        |                                    |                                      |                                    |                                    |                                   |                                     |                                              |                                              |
| <b>2017</b>     | <b>5.53</b>                      | <b>1.11</b>                      |                                        |                                    |                                      |                                    |                                    |                                   |                                     |                                              |                                              |
| DJF             | 10.5                             | 2.19                             |                                        |                                    |                                      |                                    |                                    |                                   |                                     |                                              |                                              |
| MAM             | 3.37                             | 0.66                             |                                        |                                    |                                      |                                    |                                    |                                   |                                     |                                              |                                              |

|               | OC<br>( $\mu\text{g C m}^{-3}$ ) | EC<br>( $\mu\text{g C m}^{-3}$ ) | Levoglucosan<br>( $\text{ng m}^{-3}$ ) | Mannosan<br>( $\text{ng m}^{-3}$ ) | Galactosan<br>( $\text{ng m}^{-3}$ ) | Arabitol<br>( $\text{ng m}^{-3}$ ) | Mannitol<br>( $\text{ng m}^{-3}$ ) | Glucose<br>( $\text{ng m}^{-3}$ ) | Trehalose<br>( $\text{ng m}^{-3}$ ) | 2-methylerythritol<br>( $\text{ng m}^{-3}$ ) | 2-methylerythritol<br>( $\text{ng m}^{-3}$ ) |
|---------------|----------------------------------|----------------------------------|----------------------------------------|------------------------------------|--------------------------------------|------------------------------------|------------------------------------|-----------------------------------|-------------------------------------|----------------------------------------------|----------------------------------------------|
| JJA           | 2.67                             | 0.37                             |                                        |                                    |                                      |                                    |                                    |                                   |                                     |                                              |                                              |
| SON           | 5.62                             | 1.23                             |                                        |                                    |                                      |                                    |                                    |                                   |                                     |                                              |                                              |
| <b>2018</b>   | <b>3.75</b>                      | <b>0.77</b>                      |                                        |                                    |                                      |                                    |                                    |                                   |                                     |                                              |                                              |
| DJF           | 8.30                             | 1.59                             |                                        |                                    |                                      |                                    |                                    |                                   |                                     |                                              |                                              |
| MAM           | 2.50                             | 0.52                             |                                        |                                    |                                      |                                    |                                    |                                   |                                     |                                              |                                              |
| JJA           | 1.65                             | 0.31                             |                                        |                                    |                                      |                                    |                                    |                                   |                                     |                                              |                                              |
| SON           | 2.86                             | 0.73                             |                                        |                                    |                                      |                                    |                                    |                                   |                                     |                                              |                                              |
| <b>2019</b>   | <b>3.82</b>                      | <b>0.80</b>                      |                                        |                                    |                                      |                                    |                                    |                                   |                                     |                                              |                                              |
| DJF           | 7.74                             | 1.68                             |                                        |                                    |                                      |                                    |                                    |                                   |                                     |                                              |                                              |
| MAM           | 2.58                             | 0.57                             |                                        |                                    |                                      |                                    |                                    |                                   |                                     |                                              |                                              |
| JJA           | 2.46                             | 0.28                             |                                        |                                    |                                      |                                    |                                    |                                   |                                     |                                              |                                              |
| SON           | 2.40                             | 0.63                             |                                        |                                    |                                      |                                    |                                    |                                   |                                     |                                              |                                              |
| <b>2020</b>   | <b>4.33</b>                      | <b>0.85</b>                      |                                        |                                    |                                      |                                    |                                    |                                   |                                     |                                              |                                              |
| DJF           | 7.93                             | 1.74                             |                                        |                                    |                                      |                                    |                                    |                                   |                                     |                                              |                                              |
| MAM           | 3.06                             | 0.47                             |                                        |                                    |                                      |                                    |                                    |                                   |                                     |                                              |                                              |
| JJA           | 1.96                             | 0.25                             |                                        |                                    |                                      |                                    |                                    |                                   |                                     |                                              |                                              |
| SON           | 4.48                             | 0.97                             |                                        |                                    |                                      |                                    |                                    |                                   |                                     |                                              |                                              |
| Mean $\pm$ SD |                                  |                                  |                                        |                                    |                                      |                                    |                                    |                                   |                                     |                                              |                                              |
| <b>Annual</b> | 4.36 $\pm$ 0.82                  | 0.88 $\pm$ 0.16                  |                                        |                                    |                                      |                                    |                                    |                                   |                                     |                                              |                                              |
| DJF           | 8.62 $\pm$ 1.28                  | 1.80 $\pm$ 0.27                  |                                        |                                    |                                      |                                    |                                    |                                   |                                     |                                              |                                              |
| MAM           | 2.88 $\pm$ 0.41                  | 0.56 $\pm$ 0.08                  |                                        |                                    |                                      |                                    |                                    |                                   |                                     |                                              |                                              |
| JJA           | 2.19 $\pm$ 0.46                  | 0.30 $\pm$ 0.05                  |                                        |                                    |                                      |                                    |                                    |                                   |                                     |                                              |                                              |
| SON           | 3.84 $\pm$ 1.48                  | 0.89 $\pm$ 0.27                  |                                        |                                    |                                      |                                    |                                    |                                   |                                     |                                              |                                              |
| H-S           | 5.69 $\pm$ 0.97                  | 1.19 $\pm$ 0.20                  |                                        |                                    |                                      |                                    |                                    |                                   |                                     |                                              |                                              |
| NH-S          | 2.51 $\pm$ 0.64                  | 0.45 $\pm$ 0.09                  |                                        |                                    |                                      |                                    |                                    |                                   |                                     |                                              |                                              |

1. OC, EC, and organic tracers for Birkenes 2017 and 2018 is taken from Yttri et al., (2021), whereas for data for 2019 and 2020 is extracted from ebas.nilu.
2. OC and EC for Ispra is extracted from ebas.nilu

**Table S6:** Monthly mean ratios of levoglucosan/mannosan, mannitol/arabitol and 2-methylthreitol/2-methylerythritol at Zeppelin Observatory (2017 to 2020) and Birkenes Observatory (2017 to 2018).

| Mean ( $\pm$ SD) | Levoglucosan/<br>Mannosan       |                                 | Mannitol/<br>Arabitol           |                                 | 2-methylthreitol/<br>2-methylerythritol |                                   |
|------------------|---------------------------------|---------------------------------|---------------------------------|---------------------------------|-----------------------------------------|-----------------------------------|
|                  | Zeppelin Obs.                   | Birkenes Obs.                   | Zeppelin Obs.                   | Birkenes Obs.                   | Zeppelin Obs.                           | Birkenes Obs.                     |
| January          | 7.9 $\pm$ 1.4                   | 6.5 $\pm$ 0.1                   | 0.7 $\pm$ 0.2                   | 1.4 $\pm$ 0.8                   | 0.72 $\pm$ 0.28                         | 0.69 $\pm$ 0.00                   |
| February         | 9.0 $\pm$ 2.7                   | 6.8 $\pm$ 0.6                   | 1.0 $\pm$ 0.5                   | 2.3 $\pm$ 1.0                   | 0.51 $\pm$ 0.06                         | 0.76 $\pm$ 0.10                   |
| March            | 7.9 $\pm$ 1.2                   | 6.2 $\pm$ 0.3                   | 1.2 $\pm$ 0.2                   | 1.2 $\pm$ 0.2                   | 0.59 $\pm$ 0.13                         | 0.76 $\pm$ 0.07                   |
| April            | 7.4 $\pm$ 3.0                   | 6.6 $\pm$ 0.0                   | 1.9 $\pm$ 1.2                   | 1.0 $\pm$ 0.1                   | 0.61 $\pm$ 0.10                         | 0.60 $\pm$ 0.00                   |
| May              | 7.2 $\pm$ 1.6                   | 7.5 $\pm$ 1.0                   | 1.6 $\pm$ 0.7                   | 0.9 $\pm$ 0.1                   | 0.65 $\pm$ 0.09                         | 0.29 $\pm$ 0.05                   |
| June             | 5.3 $\pm$ 1.2                   | 5.5 $\pm$ 0.2                   | 1.3 $\pm$ 0.4                   | 1.0 $\pm$ 0.2                   | 0.64 $\pm$ 0.07                         | 0.29 $\pm$ 0.03                   |
| July             | 4.1 $\pm$ 0.8                   | 5.7 $\pm$ 0.6                   | 1.0 $\pm$ 0.3                   | 0.8 $\pm$ 0.2                   | 0.54 $\pm$ 0.20                         | 0.29 $\pm$ 0.28                   |
| August           | 4.2 $\pm$ 0.9                   | 4.4 $\pm$ 0.2                   | 1.1 $\pm$ 0.3                   | 0.9 $\pm$ 0.1                   | 0.52 $\pm$ 0.13                         | 0.34 $\pm$ 0.00                   |
| September        | 5.0 $\pm$ 1.7                   | 6.1 $\pm$ 1.4                   | 1.1 $\pm$ 0.1                   | 1.1 $\pm$ 0.2                   | 0.48 $\pm$ 0.07                         | 0.42 $\pm$ 0.01                   |
| October          | 5.3 $\pm$ 1.1                   | 5.4 $\pm$ 0.2                   | 1.2 $\pm$ 0.3                   | 1.1 $\pm$ 0.0                   | 0.54 $\pm$ 0.11                         | 0.55 $\pm$ 0.10                   |
| November         | 5.7 $\pm$ 0.8                   | 5.6 $\pm$ 0.5                   | 1.2 $\pm$ 0.1                   | 1.0 $\pm$ 0.1                   | 0.65 $\pm$ 0.17                         | 0.74                              |
| December         | 6.5 $\pm$ 1.8                   | 5.4 $\pm$ 0.4                   | 1.0 $\pm$ 0.5                   | 0.8 $\pm$ 0.0                   | 0.74 $\pm$ 0.16                         | 0.77 $\pm$ 0.09                   |
| <b>Annual</b>    | <b>6.0 <math>\pm</math> 1.8</b> | <b>6.1 <math>\pm</math> 0.1</b> | <b>1.1 <math>\pm</math> 0.5</b> | <b>1.0 <math>\pm</math> 0.0</b> | <b>0.55 <math>\pm</math> 0.16</b>       | <b>0.32 <math>\pm</math> 0.05</b> |
| DJF              | 7.8 $\pm$ 1.9                   | 6.3 $\pm$ 0.7                   | 0.9 $\pm$ 0.4                   | 1.5 $\pm$ 0.9                   | 0.65 $\pm$ 0.13                         | 0.74 $\pm$ 0.07                   |
| MAM              | 7.5 $\pm$ 2.1                   | 6.7 $\pm$ 0.8                   | 1.5 $\pm$ 0.8                   | 1.1 $\pm$ 0.2                   | 0.62 $\pm$ 0.03                         | 0.55 $\pm$ 0.22                   |
| JJA              | 4.5 $\pm$ 1.2                   | 5.2 $\pm$ 0.7                   | 1.1 $\pm$ 0.3                   | 0.9 $\pm$ 0.1                   | 0.56 $\pm$ 0.06                         | 0.31 $\pm$ 0.05                   |
| SON              | 5.9 $\pm$ 1.1                   | 5.7 $\pm$ 0.7                   | 1.1 $\pm$ 0.2                   | 1.1 $\pm$ 0.1                   | 0.56 $\pm$ 0.09                         | 0.54 $\pm$ 0.14                   |
| NH-S             | 4.8 $\pm$ 1.2                   | 5.4 $\pm$ 0.8                   | 1.1 $\pm$ 0.3                   | 1.0 $\pm$ 0.1                   | 0.54 $\pm$ 0.06                         | 0.38 $\pm$ 0.11                   |
| H-S              | 7.5 $\pm$ 1.9                   | 6.4 $\pm$ 0.8                   | 1.2 $\pm$ 0.6                   | 1.2 $\pm$ 0.6                   | 0.64 $\pm$ 0.08                         | 0.65 $\pm$ 0.18                   |

**Tale S7:** Annual mean concentrations of Antarctic baseline aerosol (ABA)<sup>1</sup> OC, EC, and positive artifact corrected OC (OC<sub>P</sub>) at Trollhaugen Observatory (Antarctica), 2016 to 2018 and 2021 to 2022.

Unit ng C m<sup>-3</sup>.

|                                 | EC                              | OC                               | OC <sub>P</sub>                 |
|---------------------------------|---------------------------------|----------------------------------|---------------------------------|
| <b>2016</b>                     | 2.0                             | 12.0                             | 7.4                             |
| <b>2017</b>                     | 2.3                             | 14.1                             | 10.9                            |
| <b>2018</b>                     | 1.4                             | 10.0                             | 7.5                             |
| <b>2021</b>                     | 2.0                             | 14.2                             | 9.3                             |
| <b>2022</b>                     | 1.7                             | 10.8                             | 7.1                             |
| <b>Mean <math>\pm</math> SD</b> | <b>1.9 <math>\pm</math> 0.3</b> | <b>12.2 <math>\pm</math> 1.9</b> | <b>8.4 <math>\pm</math> 1.6</b> |

Antarctic baseline aerosol (ABA): To differentiate between Antarctic baseline aerosol (ABA) and non-ABA, we relied on input from in-situ on-line nephelometer (TSI 3563) measurements, as defined by Fiebig et al. (2014). We considered values below the 4 weeks running 5th percentile  $\times$  2.5 of the aerosol scattering coefficient ( $\sigma_{sp}$ , 550 nm) as ABA, while values above this threshold were defined as non-ABA. We made sure not to sample at wind speeds  $>$  10 m s<sup>-1</sup> to avoid filter damage. We collected ABA and non-ABA using two high-volume samplers (Digital DHA-80 with a PM<sub>10</sub> inlet) both with double quartz fibre filters (Pallflex 2500) (McDow and Huntzicker, 1990) to estimate of the positive sampling artifact caused by semi volatile organic compounds (SVOC). The inlet of the nephelometer and high-volume samplers were positioned 5.5 meters above the ground.



Table S8. Mean PBAP and BSOA tracer concentrations for those of the top ten concentration samples collected in the non-heating season and with a levoglucosan concentration higher than the long-term annual mean at Zeppelin Observatory (2017 to 2020).

|                 | <b>Mean conc. top ten samples<br/>(ng m<sup>-3</sup>)</b> | <b>Mean conc. excl. H-Season and with levo &gt; levo long-term mean<br/>(ng m<sup>-3</sup>)</b> | <b>Mean conc. and percentile levoglucosan<br/>(ng m<sup>-3</sup>) (percentile)</b> |
|-----------------|-----------------------------------------------------------|-------------------------------------------------------------------------------------------------|------------------------------------------------------------------------------------|
| Arabitol        | 1.2                                                       | 1.3 (n=8)                                                                                       | 2.7 (96)                                                                           |
| Mannitol        | 1.0                                                       | 1.1 (n=7)                                                                                       | 2.4 (95)                                                                           |
| Trehalose       | 1.0                                                       | 1.0 (n=7)                                                                                       | 2.4 (95)                                                                           |
| Fructose        | 0.7                                                       | 1.1 (n=5)                                                                                       | 3.6 (98)                                                                           |
| Glucose         | 3.5                                                       | 3.5 (n=9)                                                                                       | 2.5 (95)                                                                           |
| Cellulose       | 5.7                                                       | 6.4 (n=3)                                                                                       | 4.3 (98)                                                                           |
| 2-Methyltetrols | 6.1                                                       | 7.8 (n=7)                                                                                       | 2.2 (94)                                                                           |

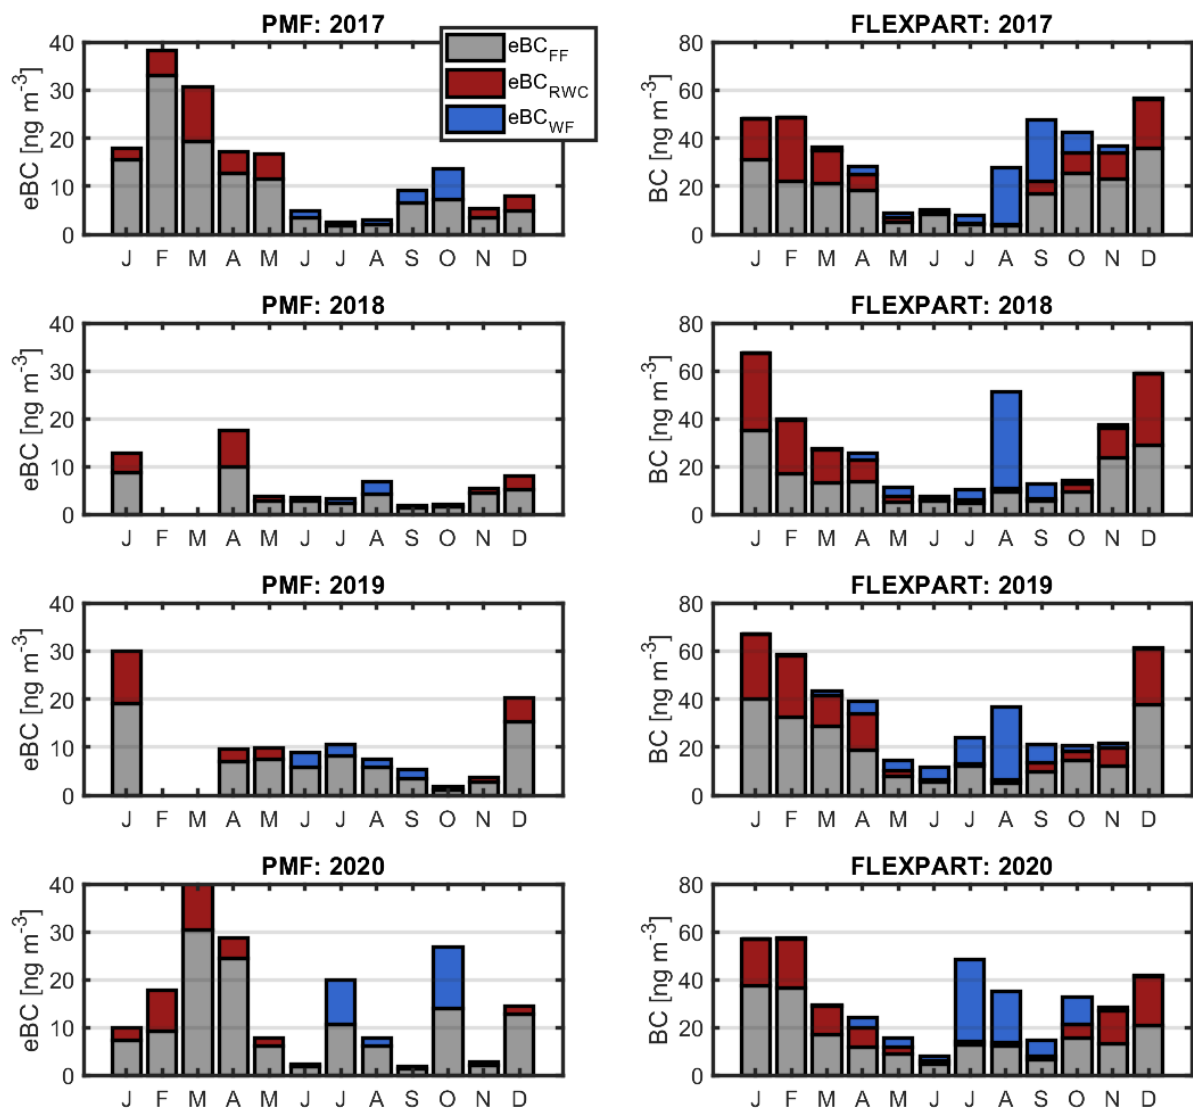

Figure S1. Monthly mean eBC concentrations (PMF) (left) and BC (FLEXPART) (right) apportioned to FF combustion and BB. BB is categorized as RWC in H-Season (red color) and WF in NH-season (blue color). Zeppelin Observatory 2017 to 2020.

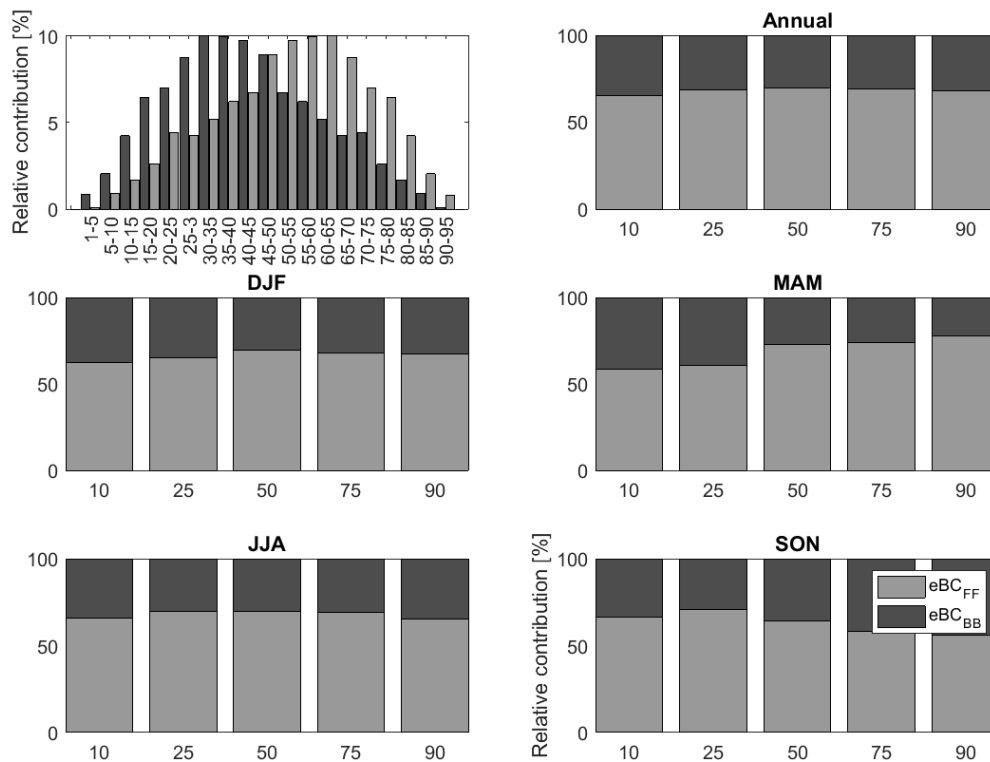

Figure S2. Frequency distribution of  $eBC_{BB}/eBC$  and  $eBC_{FF}/eBC$  fractions (left top panel), and average  $eBC_{BB}/eBC$  and  $eBC_{FF}/eBC$  fractions for  $eBC$  concentrations below the 10<sup>th</sup> and the 25<sup>th</sup> percentile, all observations (50<sup>th</sup> percentile), and above the 75<sup>th</sup> and 90<sup>th</sup> percentiles, for the Zeppelin Observatory, 2017 to 2020. Results obtained by PMF.

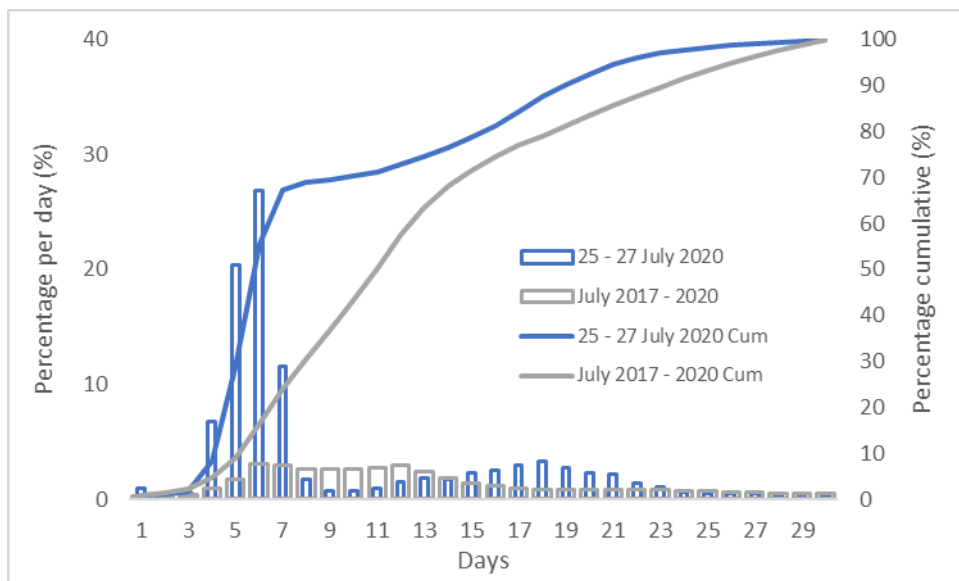

Figure S3. Transport time of modelled BC concentrations from the respective emission sources to Zeppelin Observatory. The blue line are the results for the part of the pollution episode spanning from 25 to 27 July 2020 compared to the reference period (July 2017 to 2020, grey line).
